# Supplementary material for: Estrogen receptor variant ERα46 and insulin receptor drive in primary breast cancer cells growth effects and interleukin 11 induction prompting the motility of cancer‐associated fibroblasts
Source: PubMed Central journal article supplement (PMC8567034; doi:10.1002/ctm2.516), 2021-11-04
Supplement: CTM2-11-e516-s001.pdf [file CTM2-11-e516-s001.pdf]

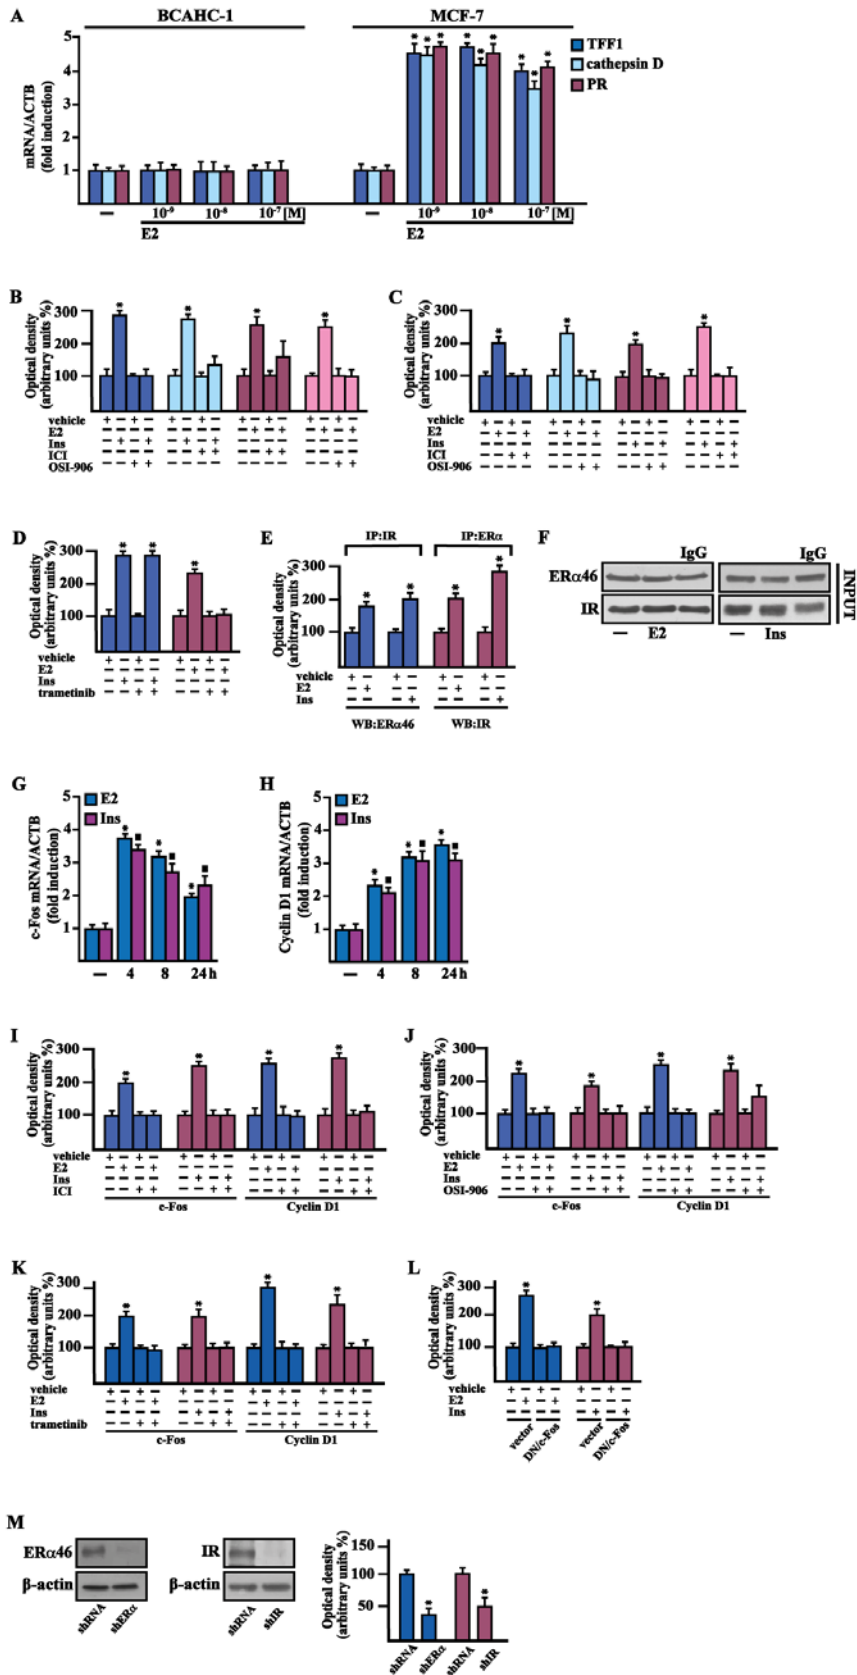

**Supplementary Fig. 1.** (A) mRNA expression of TFF1, cathepsin D and PR in BCAHC-1 and MCF-7 cells treated for 24 h with vehicle (–) and the indicated concentrations of E2, as evaluated by real-time PCR. Values are normalized to the actin beta (ACTB) expression and shown as fold changes of mRNA expression induced by treatments compared to vehicle (–). (B) Densitometric analysis of the blots shown in panels A-D of figure 3 normalized to IR, which served as loading control. (C) Densitometric analysis of the blots shown in panels E-H of figure 3 normalized to ERK2, which served as loading control. (D) Densitometric analysis of the blots shown in panels I-J of figure 3 normalized to IR, which served as loading control. (E) Densitometric analysis of the blots shown in panels K-L of figure 3, which were normalized to IR or ER $\alpha$ , as indicated. (F) Total lysates (input), in reference to co-immunoprecipitation assays shown in panels K-L of figure 3, were evaluated as control. In control samples, nonspecific IgG was used instead of the primary antibody. (G-H) mRNA expression of c-Fos (G) and Cyclin D1 (H) in BCAHC-1 cells treated with vehicle (–) and 100nM E2 or 10nM insulin (Ins) for the indicated times, as evaluated by real-time PCR. Values are normalized to the actin beta (ACTB) expression and shown as fold changes of mRNA expression induced by treatments compared to vehicle (–). (I) Densitometric analysis of the blots shown respectively in panels M-N of figure 3, normalized to  $\beta$ -actin. (J) Densitometric analysis of the blots shown respectively in panels O-P of figure 3, normalized to  $\beta$ -actin. (K) Densitometric analysis of the blots shown respectively in panels Q-R of figure 3, normalized to  $\beta$ -actin. (L) Densitometric analysis of the blots shown in panels S-T of figure 3 normalized to  $\beta$ -actin. (M) Representative immunoblots of the efficacy of ER $\alpha$  or IR silencing. Side panel shows densitometric analysis of the blots normalized to  $\beta$ -actin. Values represent the mean  $\pm$  SD of three independent experiments performed in triplicate. (\*), (■) indicate  $p < 0.05$  for cells exposed to treatments versus vehicle (–).
