# Supplementary material for: Estrogen receptor variant ERα46 and insulin receptor drive in primary breast cancer cells growth effects and interleukin 11 induction prompting the motility of cancer‐associated fibroblasts
Source: PubMed Central journal article supplement (PMC8567034; doi:10.1002/ctm2.516), 2021-11-04
Supplement: CTM2-11-e516-s002.pdf [file CTM2-11-e516-s002.pdf]

**Supplementary Table 1. mRNA levels of hormone (A) and growth factor (B) receptors in BCAHC-1 cells, as evaluated by real-time PCR.** AR, androgen receptor; ESR1, estrogen receptor  $\alpha$ ; ESR2, estrogen receptor  $\beta$ ; GPER, g protein-estrogen receptor; GR, glucocorticoid receptor; MR, mineralocorticoid receptor; PGRA, progesterone receptor A; PGRB, progesterone receptor B; EGFR, epidermal growth factor receptor; ERBB2, Erb-B2 receptor tyrosine kinase 2; ERBB3, Erb-B2 receptor tyrosine kinase 3; IGF1R, insulin like growth factor 1 receptor; INSR A, insulin receptor A; INSR B, insulin receptor B. Values represent the mean  $\pm$  SD of three independent experiments performed in triplicate.  $p < 0.05$ .

| <b>A</b> | <b>Gene</b>           | <b>mRNA levels<br/>(pmol/<math>\mu</math>g total RNA)</b> | <b>B</b> | <b>Gene</b> | <b>mRNA levels<br/>(pmol/<math>\mu</math>g total RNA)</b> |
|----------|-----------------------|-----------------------------------------------------------|----------|-------------|-----------------------------------------------------------|
|          | AR                    | < 0.001                                                   |          | EGFR        | < 0.001                                                   |
|          | ESR1<br>(C-E domains) | 290 $\pm$ 23                                              |          | ERBB2       | < 0.001                                                   |
|          | ESR1<br>(A-B domains) | < 0.001                                                   |          | ERBB3       | < 0.001                                                   |
|          | ESR2                  | < 0.001                                                   |          | IGF1R       | < 0.001                                                   |
|          | GPER                  | < 0.001                                                   |          | INSR A      | 667 $\pm$ 35                                              |
|          | GR                    | < 0.001                                                   |          | INSR B      | 332 $\pm$ 29                                              |
|          | MR                    | < 0.001                                                   |          |             |                                                           |
|          | PGRA                  | < 0.001                                                   |          |             |                                                           |
|          | PGRB                  | < 0.001                                                   |          |             |                                                           |
