# Supplementary material for: Estrogen receptor variant ERα46 and insulin receptor drive in primary breast cancer cells growth effects and interleukin 11 induction prompting the motility of cancer‐associated fibroblasts
Source: PubMed Central journal article supplement (PMC8567034; doi:10.1002/ctm2.516), 2021-11-04
Supplement: CTM2-11-e516-s004.pdf [file CTM2-11-e516-s004.pdf]

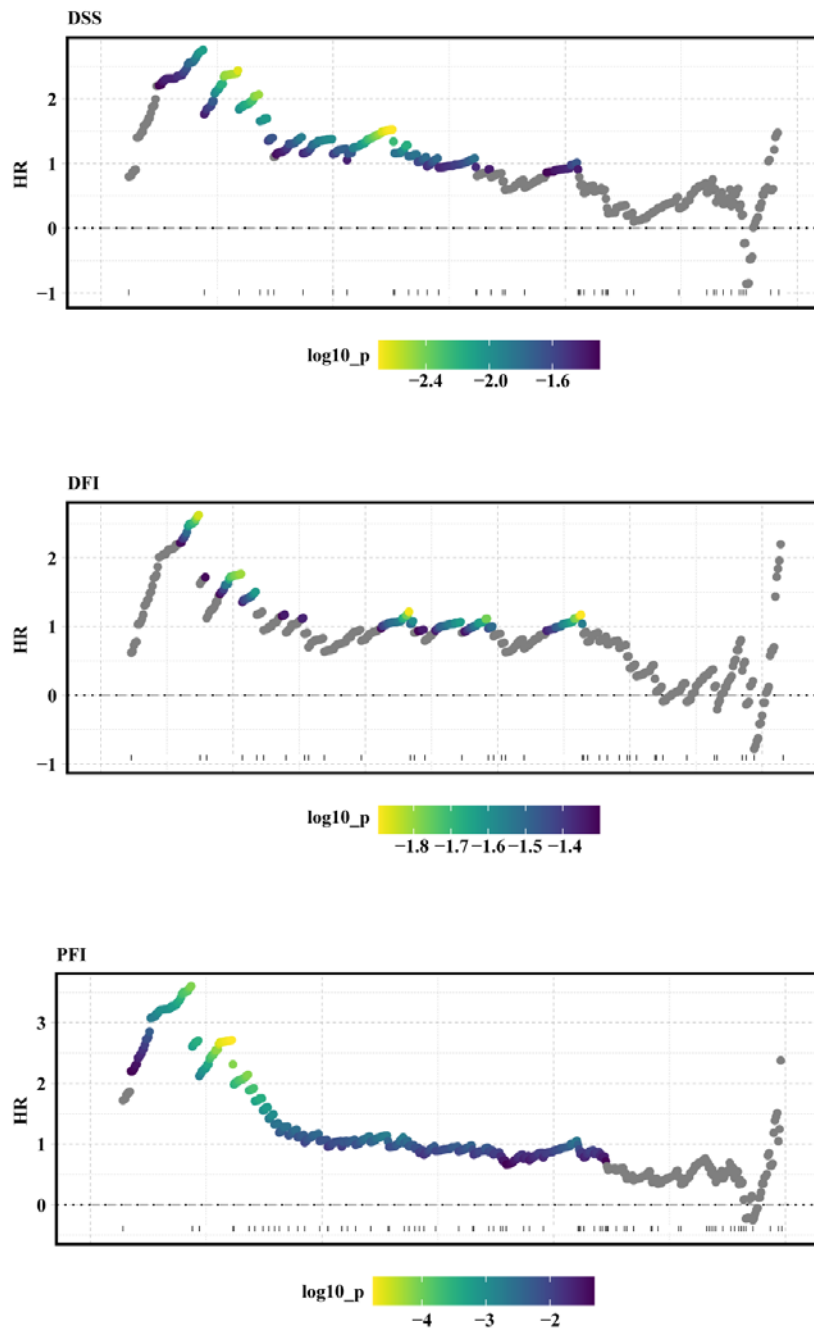

**Supplementary Fig. 3.** The plotALL function of surviALL calculating hazard ratios (HR) (y-axis) for all possible IL11 cut-points to be examined. TCGA breast cancer patients ordered by increasing expression of IL11 (x-axis). The color bar gradient stands for range of the most significant points-of-separation of the population (low-high significance = blue-yellow gradient) based on IL11 expression and disease specific survival (DSS), disease-free interval (DFI) and progression-free interval (PFI) of each patient.
