# Supplementary material for: Estrogen receptor variant ERα46 and insulin receptor drive in primary breast cancer cells growth effects and interleukin 11 induction prompting the motility of cancer‐associated fibroblasts
Source: PubMed Central journal article supplement (PMC8567034; doi:10.1002/ctm2.516), 2021-11-04
Supplement: CTM2-11-e516-s005.pdf [file CTM2-11-e516-s005.pdf]

**Supplementary Table 2.** The top 100 up-regulated and down-regulated genes by E2 treatment along with their log2 fold change.  $p \leq 0.05$ .

| Up-regulated genes | log2 fold change | Up-regulated genes | log2 fold change |
|--------------------|------------------|--------------------|------------------|
| YDJC               | 4.49             | DUSP12             | 0.95             |
| ITGB1BP2           | 4.26             | CEP44              | 0.95             |
| GDPD3              | 4.22             | SS18L2             | 0.93             |
| HIST1H2BE          | 3.65             | CXCL2              | 0.93             |
| FGF7               | 3.32             | ST7L               | 0.93             |
| IL11               | 3.3              | TOR2A              | 0.93             |
| OTOP1              | 3.13             | TMEM171            | 0.92             |
| PABPN1             | 1.98             | SEPSECS            | 0.92             |
| SAG                | 1.97             | MIR3064            | 0.9              |
| ZNF799             | 1.87             | SSPN               | 0.89             |
| MSRB3              | 1.65             | RPPH1              | 0.89             |
| FAM151B            | 1.62             | F8                 | 0.89             |
| ZNF34              | 1.54             | DIMT1              | 0.89             |
| ELAC1              | 1.51             | MB21D1             | 0.88             |
| C11orf74           | 1.51             | ALG5               | 0.88             |
| P2RX3              | 1.51             | PEX3               | 0.88             |
| FGL1               | 1.5              | HACL1              | 0.88             |
| ZNF480             | 1.46             | TXNRD2             | 0.88             |
| FAM133CP           | 1.44             | C8orf76            | 0.87             |
| NEK4               | 1.41             | TIMM10             | 0.87             |
| ZKSCAN3            | 1.36             | ZNF880             | 0.87             |
| CFP                | 1.33             | MTRNR2L6           | 0.86             |
| PSTK               | 1.33             | SNX16              | 0.86             |
| MRPL57             | 1.26             | MIR5047            | 0.86             |
| TOMM5              | 1.25             | VHL                | 0.84             |
| ATF3               | 1.24             | CRBN               | 0.84             |
| TPPP3              | 1.21             | C5orf22            | 0.84             |
| ZNF564             | 1.15             | MT2A               | 0.84             |
| ZNF891             | 1.14             | N6AMT2             | 0.83             |
| SYT12              | 1.1              | DHRS7              | 0.83             |
| MTRNR2L2           | 1.1              | DYNLL1             | 0.83             |
| CCT6P3             | 1.1              | UQCRC2             | 0.83             |
| FBXL2              | 1.09             | MRPL53             | 0.82             |
| PIGH               | 1.08             | PTDSS2             | 0.82             |
| MIR100HG           | 1.07             | MT1M               | 0.81             |
| ZSCAN26            | 1.06             | KBTD8              | 0.81             |
| SAC3D1             | 1.04             | ARL1               | 0.81             |
| MTRNR2L10          | 1.03             | EIF4A2             | 0.81             |
| CXCL1              | 1.03             | ZNF625             | 0.81             |
| TAF1B              | 1.02             | CDK5RAP1           | 0.81             |
| ZNF25              | 1.02             | MED21              | 0.81             |
| MT1B               | 1.01             | GS1-124K5.11       | 0.8              |
| MTRNR2L7           | 1.01             | CLDN12             | 0.8              |
| ZNF670             | 1.01             | FASTKD2            | 0.8              |
| MALAT1             | 0.99             | MRPL15             | 0.8              |
| MRTO4              | 0.99             | ZNF878             | 0.8              |
| NUDT19             | 0.98             | NKAP               | 0.8              |
| TMEM216            | 0.98             | IFRD1              | 0.79             |
| CDKN2AIPNL         | 0.97             | PHOSPHO2           | 0.79             |
| GNPNAT1            | 0.95             | VKORC1             | 0.78             |

| Down-regulated genes | log2_fold_change | Down-regulated genes | log2_fold_change |
|----------------------|------------------|----------------------|------------------|
| SNX29P2              | -4.13            | DAPK1                | -0.67            |
| RASD1                | -3.54            | TECR                 | -0.67            |
| INPP5D               | -3.18            | ZNF628               | -0.66            |
| THBS2                | -2.9             | THAP1                | -0.66            |
| TNS1                 | -1.89            | SHOX2                | -0.66            |
| IFIT3                | -1.89            | DNMBP                | -0.66            |
| LEF1                 | -1.31            | RGS12                | -0.65            |
| MYB                  | -1.29            | ZNF428               | -0.65            |
| ATP1A3               | -1.16            | MOV10                | -0.65            |
| ADD2                 | -1.12            | PRSS22               | -0.65            |
| FOXC2                | -1.09            | ZFAT                 | -0.64            |
| DCLK1                | -1.08            | PBX1                 | -0.64            |
| CDC42EP2             | -1.08            | NR2F1                | -0.64            |
| SLCO4A1              | -1.07            | FBLN2                | -0.63            |
| FAM83D               | -1.06            | THBS1                | -0.63            |
| TNIK                 | -1.06            | LAD1                 | -0.62            |
| ITGA8                | -1.05            | TONSL                | -0.61            |
| AQP1                 | -1.04            | IDH2                 | -0.61            |
| ZNF341               | -0.97            | COL16A1              | -0.61            |
| ZFPM1                | -0.92            | LPAR2                | -0.6             |
| IRAK2                | -0.91            | CCNE1                | -0.6             |
| TYRO3P               | -0.91            | PML                  | -0.6             |
| PANK1                | -0.89            | KSR1                 | -0.6             |
| SEMA3B               | -0.89            | DBN1                 | -0.6             |
| ARHGEF19             | -0.88            | PFKFB3               | -0.6             |
| HERC3                | -0.84            | TNS4                 | -0.6             |
| PRND                 | -0.82            | TSPAN9               | -0.6             |
| NRDE2                | -0.81            | FDPS                 | -0.6             |
| CEP128               | -0.81            | PTOV1                | -0.59            |
| IGSF9                | -0.8             | MON1B                | -0.58            |
| DOCK6                | -0.77            | CDK20                | -0.58            |
| RNF135               | -0.76            | FDFT1                | -0.58            |
| ABCB8                | -0.76            | TMEM201              | -0.58            |
| PKMYT1               | -0.75            | NR1D1                | -0.58            |
| SLC4A8               | -0.74            | LOC494127            | -0.58            |
| C6orf132             | -0.74            | TNRC18               | -0.57            |
| MARCKSL1             | -0.73            | MFSD10               | -0.57            |
| CYP1B1               | -0.73            | FERMT1               | -0.57            |
| MICAL2               | -0.73            | IGFBP4               | -0.57            |
| AFAP1L2              | -0.73            | LSS                  | -0.56            |
| CHTF18               | -0.71            | SMG9                 | -0.56            |
| HOXA7                | -0.71            | PLEKHO1              | -0.56            |
| PEAR1                | -0.69            | PCYT2                | -0.56            |
| UHRF1                | -0.68            | KLF4                 | -0.56            |
| PTP4A3               | -0.68            | MYBL2                | -0.56            |
| MEX3A                | -0.68            | HDAC6                | -0.55            |
| BCL9                 | -0.68            | FIZ1                 | -0.55            |
| SLC9A3R2             | -0.68            | WWP2                 | -0.55            |
| EYA2                 | -0.68            | SLC12A7              | -0.55            |
| VASH2                | -0.68            | RGL2                 | -0.55            |
