# Supplementary material for: Estrogen receptor variant ERα46 and insulin receptor drive in primary breast cancer cells growth effects and interleukin 11 induction prompting the motility of cancer‐associated fibroblasts
Source: PubMed Central journal article supplement (PMC8567034; doi:10.1002/ctm2.516), 2021-11-04
Supplement: CTM2-11-e516-s006.pdf [file CTM2-11-e516-s006.pdf]

**Supplementary Table 3.** The top 100 up-regulated and down-regulated genes by insulin treatment along with their log2 fold change.  $p \leq 0.05$ .

| Up-regulated genes | log2 fold change | Up-regulated genes | log2 fold change |
|--------------------|------------------|--------------------|------------------|
| LOC100289333       | 4.62             | GADD45G            | 1.38             |
| SNORA4             | 4.45             | SS18L2             | 1.38             |
| SERPINF2           | 4.13             | FAM151B            | 1.37             |
| MIR186             | 3.9              | MALAT1             | 1.36             |
| SNORD58A           | 3.79             | FAM167A            | 1.34             |
| SLA                | 3.73             | ANKRD23            | 1.33             |
| IL11               | 3.58             | SERP2              | 1.31             |
| DCDC2              | 3.39             | MIR5047            | 1.31             |
| HGD                | 3.33             | MTRNR2L2           | 1.3              |
| IL1B               | 3.05             | AVIL               | 1.3              |
| SNORA63            | 2.92             | PRSS56             | 1.3              |
| MAMDC2             | 2.91             | C1orf189           | 1.28             |
| PCOLCE-AS1         | 2.83             | MIR3064            | 1.27             |
| LRRC36             | 2.74             | SAA1               | 1.27             |
| SNORD2             | 2.56             | BEND6              | 1.27             |
| TRIM66             | 2.54             | ZNF439             | 1.26             |
| STMN4              | 2.51             | PLP1               | 1.25             |
| SNORD16            | 2.35             | SLC25A33           | 1.24             |
| ZNF708             | 2.34             | GTPBP2             | 1.24             |
| SNORD72            | 2.27             | FAM171B            | 1.24             |
| SOAT2              | 2.25             | SMIM3              | 1.23             |
| PCDH9              | 2.19             | HIST1H1E           | 1.23             |
| HHIPL1             | 2.03             | CCNE2              | 1.23             |
| HNRNPU-AS1         | 2.02             | RAD51AP1           | 1.17             |
| APOE               | 1.95             | GNPNAT1            | 1.17             |
| SNORA25            | 1.94             | AOC2               | 1.16             |
| KLHDC1             | 1.91             | SYBU               | 1.16             |
| EFNB3              | 1.88             | ZNF346             | 1.16             |
| BTG4               | 1.88             | EPSTI1             | 1.15             |
| ZNF799             | 1.85             | ERCC8              | 1.15             |
| CFP                | 1.85             | CCL20              | 1.14             |
| CDSN               | 1.83             | DUSP8              | 1.13             |
| SNORA72            | 1.78             | CTH                | 1.13             |
| EAF2               | 1.76             | FAM195A            | 1.12             |
| SNORA73B           | 1.73             | DDIT3              | 1.11             |
| TPPP3              | 1.7              | PTPRU              | 1.1              |
| LIME1              | 1.66             | DDIAS              | 1.1              |
| AREG               | 1.63             | RPPH1              | 1.1              |
| FAM133CP           | 1.62             | POP5               | 1.1              |
| P2RX3              | 1.6              | DRP2               | 1.08             |
| GDAP1L1            | 1.56             | CDH8               | 1.08             |
| ZNF117             | 1.55             | CCDC137            | 1.07             |
| ZNF766             | 1.51             | PPCDC              | 1.07             |
| RHBDL1             | 1.49             | CYCSP52            | 1.07             |
| CYP26A1            | 1.46             | SLC9A5             | 1.06             |
| IMPACT             | 1.46             | MDM4               | 1.06             |
| ATF3               | 1.45             | MTHFD2P1           | 1.06             |
| ANGPTL6            | 1.45             | PSPH               | 1.06             |
| ZNF329             | 1.38             | ZNF564             | 1.06             |
| AMT                | 1.38             | MTRNR2L10          | 1.06             |

| Down-regulated genes | log2 fold change | Down-regulated genes | log2 fold change |
|----------------------|------------------|----------------------|------------------|
| PCDHB6               | -4.28            | ELMOD3               | -1.22            |
| KLHL38               | -3.6             | SNX21                | -1.22            |
| SNX29P2              | -3.29            | LOXL3                | -1.21            |
| APOB                 | -2.99            | TSPYL6               | -1.21            |
| GALNT15              | -2.82            | CALCOCO1             | -1.2             |
| VIM-AS1              | -2.67            | CD14                 | -1.2             |
| RAB3B                | -2.45            | FAM114A1             | -1.19            |
| THBS2                | -2.22            | ATP13A2              | -1.19            |
| MYO5B                | -2.13            | CPT1A                | -1.19            |
| TIGD5                | -1.84            | BCKDHA               | -1.18            |
| IFIT3                | -1.82            | TRIB2                | -1.16            |
| DIO2                 | -1.75            | RAB3D                | -1.16            |
| SLC25A45             | -1.71            | TRPM6                | -1.16            |
| PDCD4                | -1.68            | ASAP3                | -1.15            |
| NDUFAF3              | -1.66            | VASH2                | -1.15            |
| AP5B1                | -1.66            | MMP14                | -1.14            |
| DCP1B                | -1.65            | SHF                  | -1.13            |
| SMAD6                | -1.6             | OLFM1                | -1.12            |
| TSPAN17              | -1.56            | ZNF358               | -1.11            |
| PDK2                 | -1.52            | IRF7                 | -1.11            |
| DYRK1B               | -1.5             | PNRC1                | -1.11            |
| VWA5A                | -1.5             | PRSS8                | -1.11            |
| KIAA1161             | -1.48            | VIM                  | -1.11            |
| SOX15                | -1.45            | ATP5SL               | -1.1             |
| ITGA8                | -1.4             | KLHL36               | -1.1             |
| ENOX1                | -1.38            | PXYLP1               | -1.09            |
| CUL7                 | -1.37            | SH2D3C               | -1.08            |
| LBH                  | -1.35            | TCAF1                | -1.08            |
| FBXO32               | -1.35            | CSAD                 | -1.08            |
| FAM102A              | -1.33            | OGFOD3               | -1.07            |
| ARHGEF19             | -1.31            | PDE5A                | -1.06            |
| PAX5                 | -1.28            | GBP1                 | -1.05            |
| PINK1                | -1.28            | TACC1                | -1.04            |
| TMIE                 | -1.28            | PXMP4                | -1.03            |
| PTHLH                | -1.27            | MOV10                | -1.03            |
| LOC100653233         | -1.26            | FMNL3                | -1.03            |
| ADD2                 | -1.26            | TTYH3                | -1.02            |
| AMIGO2               | -1.25            | CTDSP2               | -1.02            |
| FOXO4                | -1.25            | ALDH3A1              | -1.02            |
| FZD2                 | -1.25            | SESN3                | -1.02            |
| MMP11                | -1.24            | SLC43A2              | -1.02            |
| FBXL8                | -1.24            | BTBD2                | -1.02            |
| BCAS3                | -1.23            | TNS4                 | -1.01            |
| TMC4                 | -1.23            | DCAF8L1              | -1               |
| TCF7L1               | -1.23            | OCIAD2               | -1               |
| ROBO1                | -1.23            | TKFC                 | -1               |
| KATNAL2              | -1.23            | PTMS                 | -1               |
| CHST12               | -1.23            | RDH10                | -1               |
| FAH                  | -1.23            | FOXN3                | -1               |
| LDHB                 | -1.22            | CTXN1                | -0.99            |
