# Supplementary material for: Estrogen receptor variant ERα46 and insulin receptor drive in primary breast cancer cells growth effects and interleukin 11 induction prompting the motility of cancer‐associated fibroblasts
Source: PubMed Central journal article supplement (PMC8567034; doi:10.1002/ctm2.516), 2021-11-04
Supplement: CTM2-11-e516-s007.pdf [file CTM2-11-e516-s007.pdf]

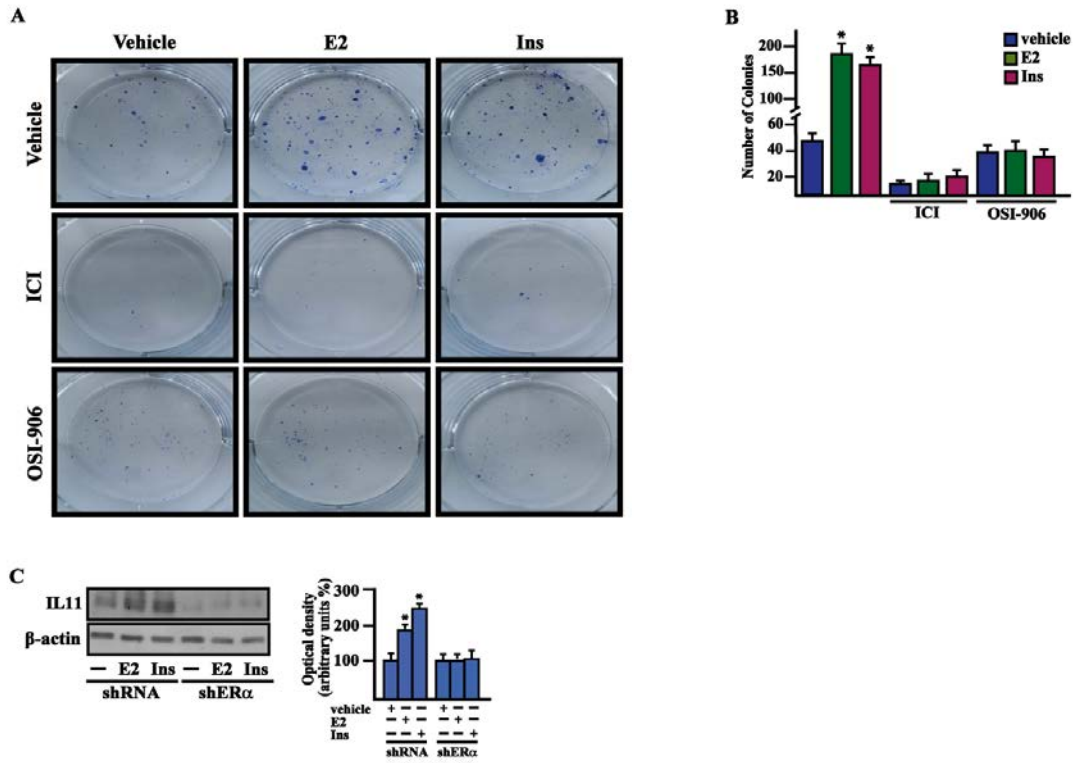

**Supplementary Fig. 2.** (A) Colony formation assay in BCAHC-1 cells exposed to vehicle, 100nM E2 or 10nM insulin (Ins) alone and in combination with 1 $\mu$ M ER $\alpha$  antagonist ICI 182,780 (ICI) and 1 $\mu$ M IR inhibitor OSI-906. (B) After 10 days of treatment, the plates were stained with Giemsa, and colonies were counted. (C) The up-regulation of IL11 protein levels induced by 8 h treatment with 100nM E2 and 10nM insulin (Ins) is prevented silencing ER $\alpha$ 46 expression. Side panel shows densitometric analysis of the blot normalized to  $\beta$ -actin. Representative immunoblot of the efficacy of ER $\alpha$  silencing is shown in supplementary figure 1 (panel M). Values represent the mean  $\pm$  SD of three independent experiments performed in triplicate. (\*) indicates  $p < 0.05$  for cells exposed to treatments versus vehicle (-).
